# Supplementary material for: Biological characteristics of marine Streptomyces SK3 and optimization of cultivation conditions for production of compounds against Vibiriosis pathogen isolated from cultured white shrimp (Litopenaeus vannamei)
Source: PeerJ. 2024 Sep 24;12:e18053. doi: 10.7717/peerj.18053 (PMC11430173; doi:10.7717/peerj.18053)
Supplement: Supplemental Information 2 [file peerj-12-18053-s002.xlsx]

## Sheet: Type of mediums
raw data
Figure 5.	Types of media used for S. hiroshimensis culture to produce BSMs determined by anti-V. harveyi potential
	Type of medium	Inhibition zone (mm)		Mean	Standard error
No.		R1	R1
1	YMB	29.5	30.66	30.08	0.58
2	TSB	20.5	21.66	21.08	0.58
3	MB	16.5	17.66	17.08	0.58
4	MHB	0	0	0	0
5	NB	0	0	0	0
6	ISP1	16	16	16	0
7	ISP3	25	25	25	0
8	ISP5	22.5	23.66	23.08	0.58
9	ISP7	20.06	20	20.03	0.03
raw data
Figure 6.	Media optimization relevant to potential of BSMs production determined by anti-V. harveyi potential
	Medium	Inhibition zone (mm)		Mean	Standard error
		R1	R1
	YM	28	28	28	0
	YM/2	34	34	34	0
	YM/3	24.66	23.5	24.08	0.58
	YM/4	18.66	17.5	18.08	0.58
	YM/5	12.79	10.5	11.645	1.145
	YM/6	11.33	11.33	11.33	0
	ISP3	21.79	19.5	20.645	1.145
	ISP3/2	26.66	25.5	26.08	0.58
	ISP3/3	14.79	12.5	13.645	1.145
	ISP3/4	12.79	10.5	11.645	1.145
	ISP3/5	0	0	0	0
	ISP3/6	0	0	0	0

## Sheet: Total protein
	raw data	Total protein secretion in liquid medium
raw data	Figure 7.
Figure 7.
	Time (Hours)	Dry weight of cell (mg/ml)		Mean	Standard error	total protein μg/200 μl		Mean	Standard error
		R1	R2			R1	R2
	0	0	0	0	0	0	0	0	0
	4	0.12	0.121	0.1205	0.0005	0.2	0.19	0.195	0.005
	8	0.181	0.122	0.1515	0.0295	0.305	0.295	0.3	0.005
	12	0.139	0.189	0.164	0.025	0.402	0.397	0.3995	0.0025
	16	0.24	0.324	0.282	0.042	0.498	0.499	0.4985	0.0005
	20	0.52	0.42	0.47	0.05	0.604	0.601	0.6025	0.0015
	24	1.549	1.509	1.529	0.02	0.728	0.726	0.727	0.001
	48	3.435	3.391	3.413	0.022	1.54	1.55	1.545	0.005
	72	6.482	6.452	6.467	0.015	4.904	4.901	4.9025	0.0015
	96	9.764	9.743	9.7535	0.0105	8.351	8.36	8.3555	0.0045
	120	9.724	9.768	9.746	0.022	8.331	8.34	8.3355	0.0045
	144	9.79	9.69	9.74	0.05	8.351	8.33	8.3405	0.0105
	168	9.754	9.735	9.7445	0.0095	7.121	7.1	7.1105	0.0105
	192	9.759	9.729	9.744	0.015	6.931	6.89	6.9105	0.0205
	216	7.701	7.661	7.681	0.02	6.411	6.43	6.4205	0.0095
	240	7.061	7.021	7.041	0.02	6.351	6.361	6.356	0.005
	264	6.07	5.97	6.02	0.05	6.41	6.391	6.4005	0.0095
	288	5.185	5.226	5.2055	0.0205	6.394	6.411	6.4025	0.0085

## Sheet: Other conditions
raw data	Initial incubation temperature and BSMs production determined by anti-V. harveyi potential
Figure 8.
	temperature (Cº)	Inhibition zone (mm)		Mean	Standard error
		R1	R2
	10	0	0	0	0
	20	16.9	15.73	16.315	0.585
	30	28	28	28	0
	40	12.9	11.74	12.32	0.58
	50	12.92	11.76	12.34	0.58
raw data	Incubation period and BSMs production indicated by inhibition zone of anti-V. harveyi
Figure 9.
		V. harveyi
	Incubation period (days)	Inhibition zone (mm)		Mean	Standard error
		R1	R2
	1	0	0	0	0
	2	0	0	0	0
	3	16.9	15.74	16.32	0.58
	4	23.9	22.73	23.315	0.585
	5	27.65	28.8	28.225	0.575
	6	27.65	28.81	28.23	0.58
	7	27	29	28	1
	8	27	25	26	1
	9	26.81	27.97	27.39	0.58
	10	26.8	27.96	27.38	0.58
raw data	Agitation speed on BSMs production of S. hiroshimensis determined by inhibition zone of anti-V. harveyi
Figure 10.
	Agitation speed (× 10 rpm)	Inhibition zone (mm)		Mean	Standard error
		R1	R2
	0	0	0	0	0
	100	16.9	15.73	16.315	0.585
	150	20	20	20	0
	200	35.9	34.74	35.32	0.58
	250	23.92	22.76	23.34	0.58
raw data	Initial pH of medium on BSMs production of S.hiroshimensis determined by inhibition zone of anti-V. harveyi
Figure 11.
	pH	Inhibition zone (mm)		Mean	Standard error
		R1	R2
	3	0	0	0	0
	4	0	0	0	0
	5	13.99	15.14	14.565	0.575
	6	28.95	27.78	28.365	0.585
	7	33	33	33	0
	8	27.91	26.75	27.33	0.58
	9	23	23	23	0
	10	18.91	17.75	18.33	0.58
	11	15.09	16.25	15.67	0.58
	12	0	0	0	0
raw data	Type of carbon sources supplemented to culture media and BSMs production potential of S. hiroshimensis determined by inhibition zone of anti-V. harveyi
Figure 12.
	Carbon sources	Inhibition zone (mm)		Mean	Standard error
		R1	R2
	Glucose	0	0	0	0
	Maltose	14.42	15.58	15	0.58
	Sucrose	17.67	17.67	17.67	0
	Glycerol	21.33	19.33	20.33	1
	Starch	23.5	22.5	23	0.5
	unsupplement	34.91	33.75	34.33	0.58
raw data	Nitrogen sources and BSMs production of S. hiroshimensis determined by inhibition zone of anti-V. harveyi
Figure 13.
	Nitrogen sources	Inhibition zone (mm)		Mean	Standard error
		R1	R2
	Casein	22.67	22.67	22.67	0
	Peptone	21.16	22.17	21.665	0.505
	Beef extract	20.67	20.67	20.67	0
	Malt extract	24.33	22.33	23.33	1
	Urea	17.42	18.58	18	0.58
	unsupplement	32.09	33.25	32.67	0.58
raw data	Types trace elements and BCs production of S. hiroshimensis determined by inhibition zone
Figure 14.
	Trace elements	Inhibition zone (mm)		Mean	Standard error
		R1	R2
	FeSO4	0	0	0	0
	MgSO4	34.67	32.67	33.67	1
	CaCO3	34.25	33.09	33.67	0.58
	K2HPO4	0	0	0	0
	KH2PO4	18.42	19.58	19	0.58
	KCI	0	0	0	0
	KNO3	0	0	0	0									No supplement
	unsupplement	33.09	34.25	33.67	0.58
raw data	Salt concentration and BSMs production determined by inhibition zone
Figure 15.
	Salt concentration (%)	Inhibition zone (mm)		Mean	Standard error
		R1	R2
	0	28.67	28.67	28.67	0
	0.5	32.09	33.25	32.67	0.58
	1	24.33	22.33	23.33	1
	1.5	17.42	18.58	18	0.58
	2	18.09	19.25	18.67	0.58
	2.5	12.33	12.33	12.33	0
	3	0	0	0	0
